# Supplementary material for: Kinetics of CO2 diffusion in human carbonic anhydrase: a study using molecular dynamics simulations and the Markov-state model
Source: Royal Society of Chemistry journal article supplement (doi:10.1039/c7cp00887b), 2017-01-01
Supplement: c7cp00887b1.pdf [file c7cp00887b1.pdf]

## Supplementary Information:

# Kinetics of CO<sub>2</sub> Diffusion in Human Carbonic Anhydrase: A Study by Molecular Dynamics Simulation and the Markov-State Model

Gong Chen<sup>a,b,c</sup>, Xian Kong<sup>a,b</sup>, Diannan Lu<sup>\*a,b</sup>, Jianzhong Wu<sup>\*c</sup>, Zheng Liu<sup>\*a,b,d</sup>

Key Laboratory of Industrial Biocatalysis, Ministry of Education, China.

Dept. of Chemical Engineering, Tsinghua University, Beijing 100084, China.

Dept. of Chemical and Environmental Engineering, University of California, Riverside, CA 92521, USA.

Jiangsu National Synthetic Innovation Centre for Advanced Materials, Nanjing 211800, China

Email: ludiannan@mail.tsinghua.edu.cn; jwu@ucr.edu; liuzheng@mail.tsinghua.edu.cn

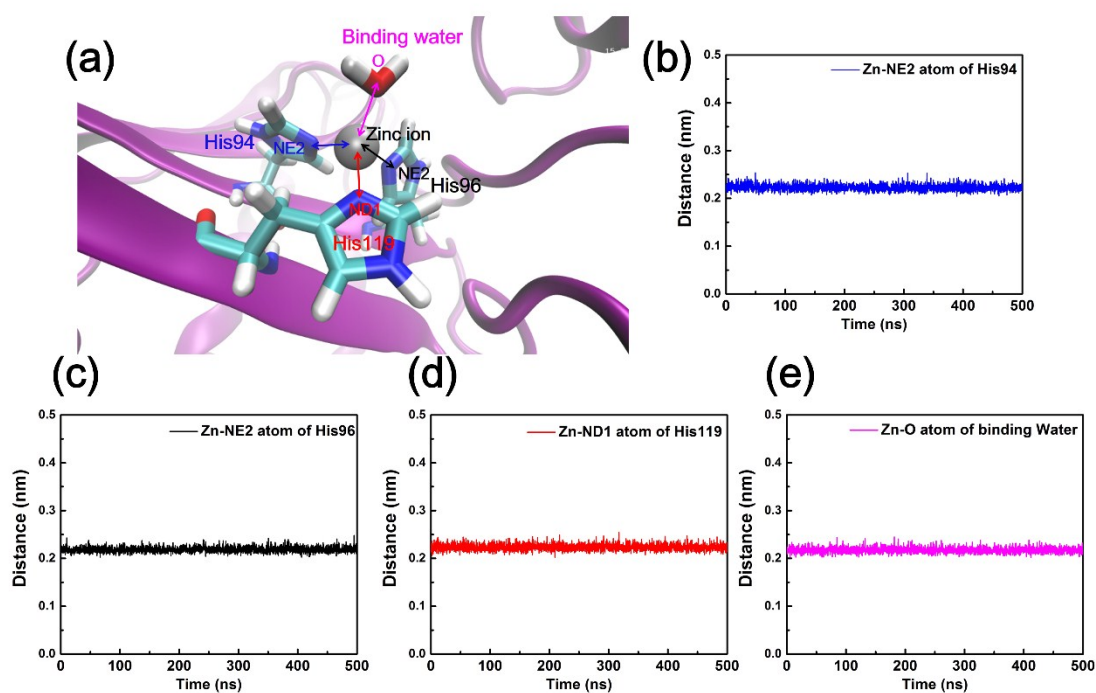

**Fig. S1** (a) A snapshot of the zinc complex in HCA-II; Evolution of the distances from the zinc ion to (b) the nitrogen atom at His<sup>94</sup> (NE2 ); (c) to the nitrogen atom at His<sup>96</sup> (NE2); (d) to the nitrogen atom at His<sup>119</sup> (ND1 );(e) and to the oxygen atom of the bound water.

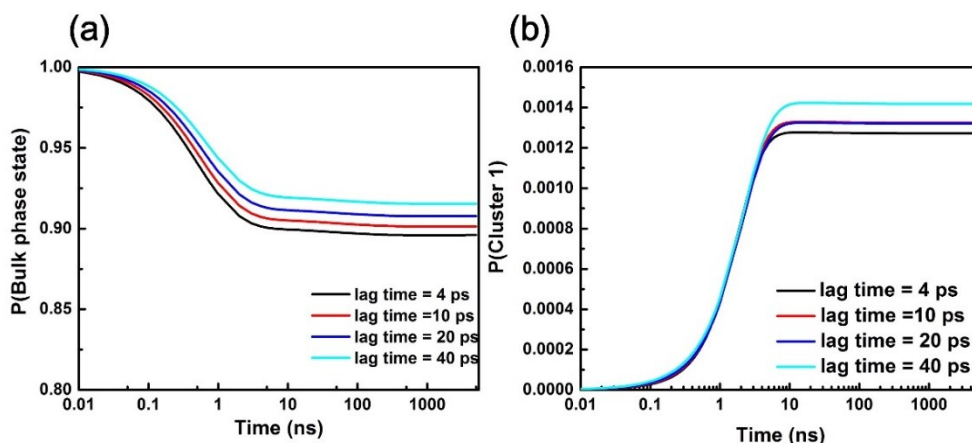

**Fig. S2** The probability of the Markov state corresponding to the bulk phase (a) and that corresponding to cluster 1 (b) calculated with different lagtimes (4, 10, 20, 40 ps).

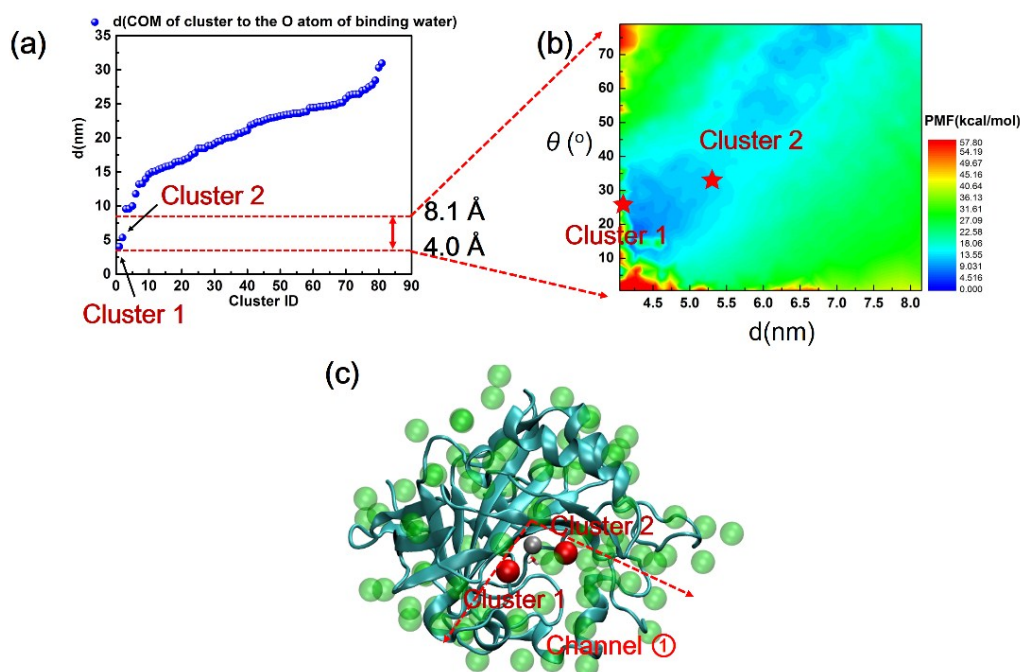

**Fig. S3** (a) COM of all clusters to the oxygen atom of the bound water; (b) Cluster 1 and cluster 2 are mapped on the free energy landscape in Fig. 2 of manuscript according to the reaction coordinate  $d$ , other Markov states could not be mapped on the free-energy landscape because this free energy landscape only samples the part of region of channel 1:  $d$  from 4.0 Å to 8.1 Å; (c) snapshots of clusters and hCA-II, cluster 1 and cluster 2 are in red, others are rendered as green spheres.

**Table S1** The amino acid composition of cluster 1 to 10 and experimentally found hydrophobic pocket of CO<sub>2</sub> in [1]

| Cluster ID | Amino acids                                                              |
|------------|--------------------------------------------------------------------------|
| 1          | Val <sup>143</sup> Leu <sup>198</sup> Trp <sup>209</sup>                 |
| 2          | His <sup>64</sup> Ala <sup>65</sup> His <sup>96</sup> Thr <sup>200</sup> |
| 3          | Trp <sup>5</sup> Gly <sup>6</sup> Pro <sup>201</sup>                     |

|                                                       |                                                                                                                   |
|-------------------------------------------------------|-------------------------------------------------------------------------------------------------------------------|
| 4                                                     | Asn <sup>62</sup>                                                                                                 |
| 5                                                     | Trp <sup>5</sup>                                                                                                  |
| 6                                                     | Tyr <sup>7</sup> Pro <sup>13</sup> Trp <sup>245</sup> Arg <sup>246</sup>                                          |
| 7                                                     | Trp <sup>123</sup> Phe <sup>131</sup> Ala <sup>134</sup> Val <sup>135</sup> Gly <sup>140</sup> Leu <sup>141</sup> |
| 8                                                     | Trp <sup>16</sup> Asp <sup>19</sup> Phe <sup>20</sup> Pro <sup>201</sup>                                          |
| 9                                                     | Tyr <sup>7</sup> Val <sup>242</sup> Asp <sup>243</sup>                                                            |
| 10                                                    | Leu <sup>148</sup> Val <sup>223</sup> Phe <sup>226</sup>                                                          |
| Hydrophobic pocket for CO <sub>2</sub> <sup>[1]</sup> | Val <sup>121</sup> Val <sup>143</sup> Leu <sup>198</sup> Trp <sup>209</sup>                                       |

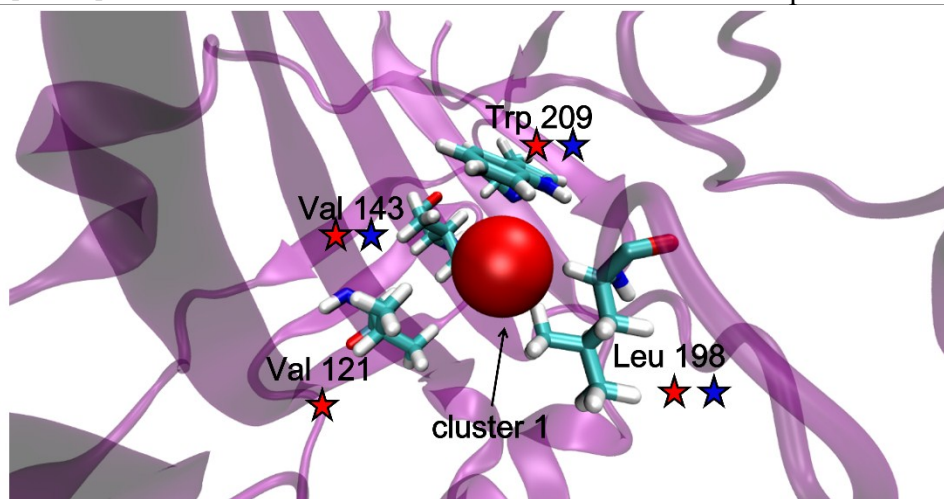

- ★ Experimentally found amino acids of hydrophobic pocket for CO<sub>2</sub> in active site of hCAII
- ★ Composition of cluster 1, definition of composition of each cluster is defined in the main text

**Fig. S4** Snapshots of cluster 1 and Val<sup>121</sup>, Val<sup>143</sup>, Leu<sup>198</sup>, Trp<sup>209</sup> in hCA-II, red star marks the experimentally found amino acids of hydrophobic pocket for CO<sub>2</sub> in active site of hCA-II<sup>[1]</sup>, blue star marks the composition of cluster 1.

## References

1. Domsic, J.F., et al., *Entrapment of carbon dioxide in the active site of carbonic anhydrase II*. Journal of Biological Chemistry, 2008. **283**(45): p. 30766-30771.
